23 University, Nanjing, China.

24 <sup>5</sup> Department of Neurology, The Second Hospital of Hebei Medical University,  
25 Shijiazhuang, China.

26 <sup>6</sup> Department of Neurology, Affiliated Hospital of Chifeng University, Chifeng,  
27 China.

28 <sup>7</sup> Department of Neurology, Shandong Provincial Hospital Affiliated to Shandong  
29 University, Jinan, China.

30 <sup>8</sup> Department of Neurology, Division of Global Health, New York University Langone  
31 Health, New York, The United States of America.

32 <sup>9</sup> Department of Neurology, Beijing Tongren Hospital, Capital Medical University,  
33 Beijing, China.

34 <sup>10</sup> Department of Neurology, Affiliated Hospital of Jining Medical University, Jining,  
35 China.

36 <sup>11</sup> Department of Neurology, Tianjin Huanhu Hospital, Tianjin, China.

37 <sup>12</sup> Department of Neurology, China–Japan Friendship Hospital, Beijing, China.

38 <sup>13</sup> Department of Paediatrics, Affiliated Hospital of Inner Mongolia Medical  
39 University, Hohhot, China.

40 <sup>14</sup> Department of Infectious Diseases, Peking Union Medical College Hospital,  
41 Chinese Academy of Medical Sciences and Peking Union Medical College, Beijing,  
42 China.

43 <sup>15</sup> Tianjin Medical Laboratory, BGI-Tianjin, BGI-Shenzhen, Tianjin, China.

44 <sup>16</sup> Binhai Genomics Institute, BGI-Tianjin, BGI-Shenzhen, Tianjin, China.

45 <sup>17</sup> University of Chinese Academy of Sciences, Beijing, China.

46 <sup>18</sup> Key Laboratory of Genome Sciences and Information, Beijing Institute of

47 Genomics, Chinese Academy of Sciences, Beijing, China.

48 <sup>19</sup> BGI genomics, BGI-Shenzhen, Shenzhen, China.

49 <sup>20</sup> School of Public Health, Chinese Academy of Medical Sciences and Peking Union

50 Medical College, Beijing, China.

51 <sup>21</sup> Department of Neurology, North China University of Science and Technology,

52 Tangshan, China.

53 <sup>22</sup> Department of Neurology, Inner Mongolia People's Hospital, Hohhot, China.

54 <sup>23</sup> Department of Neurology, Brain Hospital of Hunan Province, Changsha, China.

55 <sup>24</sup> Department of Neurology, Xuanwu Hospital, Capital Medical University, Beijing,

56 China.

57 <sup>25</sup> Department of Neurology, Shenzhen Baoan Shiyan People's Hospital, Shenzhen,

58 China.

59 <sup>26</sup> Department of Neurology, Capital Institute of Paediatrics, Beijing, China.

60 <sup>27</sup> Department of Neurology, Beijing Children's Hospital, Capital Medical University,

61 Beijing, China.

62 <sup>28</sup> Department of Neurology and Neuroscience Centre, the First Hospital of Jilin

63 University, Changchun, China.

64

65 \* Siyuan Fan and Xiaojuan Wang have contributed equally to this work.

66

67 Corresponding author: Hongzhi Guan.

68 Department of Neurology, Peking Union Medical College Hospital, Chinese Academy

69 of Medical Sciences and Peking Union Medical College, Beijing 100730, China

70 Telephone Number: (0086) 10-69156371

71 Fax Number: (0086) 10-69156371

72 Email: [guanhz@263.net](mailto:guanhz@263.net)

73

74 Corresponding author: Wei Li.

75 Department of Neurology, People's Hospital of Zhengzhou University, Henan

76 Provincial People's Hospital, Zhengzhou 450003, China.

77 Telephone Number: (0086) 13939061069

78 Fax Number: (0086) 371-65897739

79 Email: [liwein@zzu.edu.cn](mailto:liwein@zzu.edu.cn)

80

81 Word Count: 2872

82

83 Running Title: mNGS of CSF in CNS Infections

84

85 **ABSTRACT**

86 **Background:** Infectious encephalitis and meningitis are often treated empirically

87 without identification of the causative pathogen. Metagenomic next-generation

88 sequencing (mNGS) is a high throughput technology that enables the detection of

89 pathogens independent of prior clinical or laboratory information.

90 **Methods:** The present study was a multicentre prospective evaluation of mNGS of

91 cerebrospinal fluid (CSF) for the diagnosis of suspected central nervous system

92 infections.

93 **Results:** A total of 276 patients were enrolled in this study between Jan 1, 2017 and

94 Jan 1, 2018. Identification of an etiologic pathogen in CSF by mNGS was achieved in

95 101 patients (36.6%). mNGS detected 11 bacterial species, 7 viral species, 2 fungal

96 species, and 2 parasitic species. The five leading positive detections were

97 varicella-zoster virus (17), *Mycobacterium tuberculosis* (14), herpes simplex virus 1

98 (12), Epstein-Barr virus (12), and *Cryptococcus neoformans* (7). False positives

99 occurred in 12 (4.3%) patients with bacterial infections known to be widespread in

100 hospital environments. False negatives occurred in 16 (5.8%) patients and included

101 bacterial, viral and fungal aetiologies.

102 **Conclusions:** mNGS of CSF is a powerful diagnostic method to identify the pathogen

103 for many central nervous system infections.

104

105 **Keywords:** encephalitis, meningitis, metagenomic next-generation sequencing,

106 diagnosis

107 **1. INTRODUCTION**

108 Infectious encephalitis and meningitis are major contributors to the neurological  
109 global burden of disease<sup>1-4</sup>. Numerous microorganisms, including bacteria, viruses,  
110 fungi, and parasites, can cause encephalitis and meningitis in immunocompetent or  
111 immunocompromised hosts; but the clinical manifestations of many infections are  
112 non-specific. Using comprehensive conventional diagnostic technologies,  
113 microbiological detection of the pathogen is achieved in only 50-80% of cases<sup>5-8</sup>. The  
114 inability to identify the infectious aetiology of encephalitis and meningitis often  
115 results in delayed, inadequate, and/or inappropriate treatment.

116 Metagenomic next-generation sequencing (mNGS) is a novel tool that allows for  
117 the simultaneous and independent sequencing of thousands to billions of DNA  
118 fragments<sup>9</sup>. Cerebrospinal fluid (CSF) is particularly suitable for NGS due to its  
119 sterility in healthy individuals. Compared with traditional individual target-specific  
120 tests, mNGS can identify pathogens without the input of clinical predictors or prior  
121 laboratory results. Several recent studies have demonstrated the capability of mNGS  
122 of CSF to identify known and unsuspected pathogens and to discover new  
123 microorganisms<sup>10-18</sup>. mNGS of CSF is being increasingly utilized in routine clinical  
124 settings for the rapid diagnosis of central nervous system infections. However, most  
125 published studies are retrospective case reports or case series<sup>11-17,19-24</sup>, and thus, large  
126 prospective studies are needed to demonstrate the clinical impact and  
127 cost-effectiveness of mNGS for the diagnosis of meningitis and encephalitis. We  
128 undertook a multicentre prospective study to comprehensively evaluate the

129 performance of mNGS of CSF for the diagnosis of central nervous system (CNS)

130 infections compared to conventional microbiological methodologies.

131

## 132 **2. METHODS**

### 133 **2.1 Participants and study design**

134 This study was a multicentre prospective cohort assessment of the mNGS of CSF for  
135 the diagnosis of suspected infectious encephalitis or meningitis. The participating  
136 sites were 20 hospitals located in 10 provinces/municipalities in China. Each hospital  
137 is a member of the Beijing Encephalitis Group. Adult patients were eligible for  
138 inclusion in the study if they presented with clinical manifestations consistent with  
139 either encephalitis or meningitis (Table 1) and if standard diagnostic examinations  
140 (Supplementary Table 1) failed to identify an etiological cause within 3 days.

141 Exclusion criteria are shown in Table 1.

142 mNGS were conducted on all CSF specimens. Relevant conventional  
143 microbiological studies (e.g. staining, culture, polymerase chain reaction [PCR],  
144 serology) were arranged according to the clinical manifestations and the results of  
145 mNGS. Conventional microbiological studies were considered the gold standard  
146 according to relevant guidelines and/or consensus<sup>2,25-27</sup> to classify the results of  
147 mNGS as true-positive, false-positive, and false-negative. Detected pathogens were  
148 classified as etiologic pathogens if the major clinical manifestations of the patient  
149 were consistent with that pathogen. All patients were treated based on the results of  
150 conventional microbiological testing (or empirically if results were negative)

151 according to the latest clinical guidelines and/or consensus. Patients were followed for  
152 at least 30 days to determine the final diagnosis. Demographic data, medical history,  
153 laboratory test results (including all conventional microbiological tests),  
154 neuroimaging findings, medical therapy, and response to treatment were collected  
155 prospectively. Patients enrolled from Jan 1, 2017 to Jan 1, 2018 were included in the  
156 final analyses.

157 This study was approved by the institutional review board of Peking Union  
158 Medical College Hospital (no. JS-890). Written informed consent was obtained from  
159 each patient or their legal surrogate prior to enrolment.

160

## 161 **2.2 mNGS of CSF**

162 CSF samples were collected according to standard sterile procedures, snap-frozen,  
163 and stored at  $-20^{\circ}\text{C}$  until they were delivered to the sequencing centre. Because  
164 reverse transcription was not performed to prepare DNA libraries, RNA viruses were  
165 not investigated in this study. mNGS of the CSF samples was performed using a  
166 standard flow that has been successfully used to detect herpes simplex virus 1 (HSV1),  
167 HSV2, varicella zoster virus (VZV), *Listeria monocytogenes*, *Brucella*, and *Taenia*  
168 *solium*<sup>12-15</sup>.

169 DNA was extracted from 300  $\mu\text{L}$  of CSF and negative ‘no-template’ controls  
170 (NTCs). Sequencing was performed on the BGISEQ-100 platform with an average of  
171 20 million total reads obtained for each sample. The qualified reads were mapped to  
172 the human reference genome using the Burrows–Wheeler Aligner to remove human



173 sequences. The remaining reads were aligned to the database of annotation, which  
174 includes the NCBI microbial genome database (<ftp://ftp.ncbi.nlm.nih.gov/genomes/>)  
175 to detect pathogens. The sequencing data was analysed in terms of the numbers of raw  
176 reads, non-human reads, and reads aligned to the microbial genome database as well  
177 as species-specific reads (genus-specific reads for *Mycobacterium tuberculosis* and  
178 *Brucella*), reads per million (RPM), and genome coverage (%). The results of mNGS  
179 were available in less than 48 hrs.

180

### 181 **2.3 Criteria for positive results of mNGS of CSF samples**

182 To reduce the influence of potential contamination, we used the following criteria for  
183 positive results of CSF mNGS:

184 1) For extracellular bacteria, fungi (excluding *Cryptococcus*), and parasites, the  
185 result was considered positive if a species detected by mNGS had a species-specific  
186 read number (SSRN)  $\geq 30$  (RPM  $\geq 1.50$ ) that ranked among the top 10 for bacteria,  
187 fungi, or parasites. Organisms detected in the NTC or that were present in  $\geq 25\%$  of  
188 samples from the previous 30 days were excluded but only if the detected SSRN was  
189  $\geq 10$ -fold than that in the NTC<sup>28</sup> or other organisms. Additionally, organisms present  
190 in  $\geq 75\%$  of samples from the previous 30 days were excluded.

191 2) For intracellular bacteria (excluding *Mycobacterium tuberculosis* and *Brucella*)  
192 and *Cryptococcus*, the result was considered positive if a species detected by NGS  
193 had a SSRN  $\geq 10$  (RPM  $\geq 0.50$ )<sup>13</sup> that ranked among the top 10 for bacteria or fungi.  
194 Pathogens detected in the NTC or that were present in  $\geq 25\%$  of samples from the

195 previous 30 days were excluded but only if the detected SSRN was  $\geq 10$ -fold than that  
196 in the NTC or other organisms.

197 3) For viruses, *Brucella*, and *Mycobacterium tuberculosis*, the result was  
198 considered positive if a species (or genus for *Mycobacterium tuberculosis*  
199 [*Mycobacterium tuberculosis* complex, MTC] and *Brucella*) detected by NGS had a  
200 SSRN  $\geq 3$  (RPM  $\geq 0.15$ )<sup>12,28</sup>. Pathogens detected in the NTC were excluded but only  
201 if the detected SSRN was  $\geq 10$ -fold than that in the NTC. In our previous clinical  
202 observations, there were a few cases without *Mycobacterium tuberculosis* infection  
203 which contained MTC-specific reads number of 1 in the mNGS results. To mitigate  
204 the possibility of false positives, we adopted the criteria of SSRN  $\geq 3$  rather than  
205 SSRN  $\geq 1$ <sup>24</sup> in this study.

206 The performance of the criteria were evaluated at the finally stage of the study,  
207 the original results of mNGS and/or clinical manifestations were used to guide the  
208 further testing of conventional microbiological studies.

209

## 210 **2.4 Statistical analysis**

211 All statistical analyses were conducted using Statistical Package for the Social  
212 Sciences (SPSS) version 17.0 and EXCEL 1810. Depending on their distribution, all  
213 data are expressed as medians with interquartile ranges (IQRs) or as means  $\pm$  standard  
214 deviation.

215

## 216 **3. RESULTS**

### 217 **3.1 Characteristics of the study participants**

218 287 patients were screened for inclusion in this study (Fig. 1). 11 patients were  
219 initially thought to have CNS infections and mNGS was performed. However, these  
220 cases were ultimately excluded following the final diagnosis of a non-infectious  
221 disease. Of these 11 excluded patients, 10 had negative mNGS results, and 1 patient  
222 receiving immunosuppressive therapy was positive for BK polyomavirus. The final  
223 cohort included 276 patients in the study. 176 (63.8%) were male and the median age  
224 was 42 years (IQR: 26–54 years). The median time from disease-onset to CSF  
225 sampling was 10 days (IQR: 5–25 days). The median white blood cell count in CSF  
226 was 80/mm<sup>3</sup> (IQR: 19–220/mm<sup>3</sup>). The median CSF monocyte cell count was 36/mm<sup>3</sup>  
227 (IQR: 10–127/mm<sup>3</sup>). During a follow-up period of 30 days, nine patients died.

228

### 229 **3.2 Performance of mNGS for diagnosing CNS infections**

230 276 CSF samples were tested by mNGS and conventional microbiological studies. 122  
231 samples were positive by mNGS (110 true positive, 12 false positive), 126 were  
232 positive by conventional microbiological tests, and 114 total positive results were  
233 considered "Etiologic Pathogens" (Table 2). All mNGS results were obtained in less  
234 than 48 hours and 101 CSF samples were positive by mNGS before any conventional  
235 microbiological tests were positive.

236 Of the patients first diagnosed by mNGS, 16.3% of infections were caused by  
237 bacterial, 15.2% by viruses, 2.9% by fungi, and 2.2% by parasites (Fig. 2A).

238 In total, NGS detected 11 bacterial species, of which *M. tuberculosis* (14 cases,

239 13.9%) and *L. monocytogenes* (7.9%) were the most common (Fig. 2B), 7 viral  
240 species (BK polyomavirus was not the etiologic pathogen), of which VZV (16.8%)  
241 and HSV1 (11.9%) were the most common, 2 fungal species, both of which were  
242 *Cryptococcus* (7.9%), and 2 parasitic species, of which *T. solium* (5.0%) was the most  
243 common. Nine co-infections with Epstein-Barr virus (EBV) (three with HSV1, two  
244 with *Brucella*, one with *Cryptococcus*, one with *S. haemolyticus*, one with *P.*  
245 *aeruginosa*, and one with *M. tuberculosis*), two co-infections with cytomegalovirus  
246 (CMV) (one with *M. tuberculosis*, and one with *Cryptococcus*), and one co-infection  
247 with BK polyomavirus (with HSV1) were detected. The EBV and BK polyomavirus  
248 did not appear to be consistent with the clinical manifestations in these two instances  
249 of co-infections.

250

### 251 **3.3 False positive results of CSF mNGS**

252 In the present study, false positives occurred in 12 (4.3%) patients and were primarily  
253 associated with bacterial infections (n=12; Table 2), including *E. coli*, *E. faecium*, *A.*  
254 *baumannii*, *S. maltophilia*, and *P. aeruginosa*, and a false positive for *Brucella* was  
255 also seen. Of note, the false-positive samples contained numerous other bacteria, that  
256 could be detected simultaneously by NGS. Using our proposed criteria, there were no  
257 false positives for viruses, fungi, or parasites. Although EBV was not the etiologic  
258 pathogen in most cases, it was present in the CSF of some patients. Additionally, there  
259 was some background contamination in most CSF samples (Supplementary Table 2)  
260 but these organisms did not meet the criteria for a positive result.

261

### 262 **3.4 False negative results of CSF mNGS**

263 In the present study, false negatives occurred in 16 (5.8%) patients (Table 2) and were  
264 associated with bacterial, viral and fungal infections. The false negative cases of  
265 bacterial infection were all treated with antibiotics prior to sequencing. In the false  
266 negative cases of viral infection, 1 or 2 SSRNs were detected in the samples but did  
267 not satisfy the proposed criteria for a positive mNGS result. If the criteria for a  
268 positive result was relaxed to a SSRN  $\geq 1$  (RPM  $\geq 0.05$ ), there were no false negative  
269 cases of HSV1 or VZV or false positive cases of HSV1, HSV2 or VZV. In this study,  
270 if we adopted the alternate criteria SSRN  $\geq 1$  (RPM  $\geq 0.05$ ) for viruses and  
271 *Mycobacterium tuberculosis*, there would be additional potential false positives,  
272 including 30 EBV, 7 CMV and 5 *Mycobacterium tuberculosis* infections. It should be  
273 pointed out that the possibility of *Mycobacterium tuberculosis* infection in the 5 cases  
274 cannot be ruled out based on the clinical and paraclinical manifestations, because the  
275 conventional microbiological methods might fail to detect the *Mycobacterium*  
276 *tuberculosis*. Of note, there were three false negative cases of *Cryptococcus* infection.

277

## 278 **4. DISCUSSION**

279 To the best of our knowledge, the present study is the first to assess the performance  
280 of mNGS for pathogen identification in a large prospective cohort of patients with  
281 suspected CNS infections. Specifically, our study compared results of mNGS of CSF  
282 to conventional microbiological studies and proposed new criteria for validating a

283 mNGS result as positive for therapeutic decision-making. Our results suggest that  
284 NGS can provide a quicker and more accurate etiologic pathogen identification than  
285 conventional microbiological methods. However, patients in the present study were  
286 only eligible to be assessed by mNGS if conventional microbiological studies, e.g.  
287 routine bacterial stains and cultures, India ink preparation, targeted PCR tests,  
288 serological tests, failed to identify an etiologic cause within 3 days. Thus, the  
289 application of CSF mNGS in the clinical setting of this study could be regarded as a  
290 quasi-first line method for diagnosing CNS infectious diseases.

291 mNGS is a high-throughput sequencing technique without the requirement of  
292 prior information, allowing detection of unsuspected or novel organisms. Importantly,  
293 mNGS can detect unsuspected pathogens that clinicians may fail to consider because  
294 of atypical clinical manifestations. Many cases of neurological infections have been  
295 unexpectedly diagnosed by mNGS of CSF<sup>11,22,29,30</sup> similar to the present study for the  
296 cases of *L. monocytogenes*, *Brucella* and *T. solium*<sup>12-14</sup>. In addition, as demonstrated  
297 in previous studies<sup>10,20,21</sup> and in the present study for the case of encephalitis caused  
298 by *Suid herpesvirus 1*<sup>31</sup>, mNGS of CSF has the ability to identify novel aetiologies of  
299 CNS infections. Furthermore, NGS can detect unexpected co-infections that may  
300 guide appropriate targeted treatment. For example, we detected co-infections of CMV  
301 and *Cryptococcus*. In routine clinical practice, if conventional microbiological  
302 methods detect *Cryptococcus*, then no further tests for other microorganisms other  
303 than HIV are usually performed. Finally, mNGS of CSF may be an appropriate tool  
304 for ruling out a broad spectrum of potential CNS infectious diseases prior to

305 concluding a final diagnosis of autoimmune diseases, such as autoantibody-negative  
306 autoimmune encephalitis.

307 Contamination of samples during specimen collection and/or processing is a  
308 major challenge when interpreting mNGS results. To reduce the potential influence of  
309 contamination, we defined strict criteria for positive mNGS results. The various types  
310 of contamination observed in the present study could be divided into two groups: (1)  
311 microorganisms commonly associated with background contamination that did not  
312 meet the criteria for a positive result (Supplementary Table 2) and (2) false positive  
313 detections that fulfilled our criteria for a positive mNGS result but were not consistent  
314 with the patients' clinical presentation and features. The contaminations derived  
315 primarily from the following sources: (1) laboratory practices (Parvovirus NIH CQV  
316 is a contaminant from silica column-based nucleic acid extraction kits)<sup>32</sup>; (2) reagents  
317 (*Bradyrhizobium*, *Burkholderia* and *Ralstonia* are common contaminants used in  
318 industrial ultrapure water systems)<sup>33,34</sup>; (3) environment (*E. coli*, *P. aeruginosa*, *E.*  
319 *faecium* and Torque teno virus are widespread pathogens in hospital environment)<sup>35,36</sup>;  
320 (4) skin or other body flora (*P. acnes*, *M. globose*, *E. coli* and *S. epidermidis* are  
321 widely associated with the human skin flora)<sup>37,38</sup>. False positive results are very likely  
322 to misguide treatment, and therefore, clinicians should be cautious when interpreting  
323 positive mNGS detection of extracellular bacteria or fungi that are widespread in  
324 hospital environments, especially when many species of bacteria are detected in a  
325 single NGS test. On the other hand, positive mNGS detection of viruses and parasites  
326 are not likely to be false positives.

327 Negative mNGS results do not necessarily exclude an infectious cause for the  
328 patient's illness. In the present study, false negative mNGS results occurred in 5.8% of  
329 cases and included bacterial, viral, and fungal infections. The prior use of antibiotics  
330 can affect the detection rate of bacteria. Low SSRN values (1 or 2 reads) can be seen  
331 in false negative results for virus detection indicating that other microbiological tests  
332 should be conducted to confirm a diagnosis when the SSRN is low for viruses. False  
333 negative cases have been reported for *Cryptococcus* due to fungal counts below the  
334 lower limit of detection for nucleic acid amplification tests<sup>39,40</sup>. The criteria of SSRN  
335  $\geq 3$  rather than  $\text{SSRN} \geq 1$  might introduce false-negative cases for *Mycobacterium*  
336 *tuberculosis* infections. As a screening method, the pathogens detected by mNGS  
337 might provide clinical clues for further investigation even if the results do not fulfil  
338 the specified criteria for a positive result.

339 Our results indicate that mNGS of CSF is a very useful test for the diagnostic  
340 evaluation of patients with suspected CNS infections. mNGS has already become a  
341 first-line laboratory method in the response to emerging infectious diseases and  
342 outbreaks of infectious diseases<sup>41,42</sup>. Moreover, increasing evidence provides a  
343 rationale for using mNGS as a first-line diagnostic test for chronic and recurring  
344 encephalitis and as a second-line test for acute encephalitis<sup>23</sup>. In the present study,  
345 more than one-third of patients were first diagnosed by mNGS of CSF within 48 hrs,  
346 indicating that this technique can be extremely useful for rapid clinical  
347 decision-making. mNGS of CSF should be considered as a first-line test for acute  
348 CNS infections when (1) a patient is critically ill and requires prompt and precise



349 therapy, (2) the clinical manifestations are non-specific and numerous target-specific  
350 tests are simultaneously applied to identify an infectious cause, 3) a broad spectrum of  
351 potential pathogens needs to be ruled out to diagnose a suspected autoimmune  
352 encephalitis, and (4) rare or novel pathogens are suspected for which standard  
353 target-specific tests are not available.

354       There are several limitations regarding the current use of mNGS of CSF in  
355 routine clinical settings. First, mNGS is not available in many hospitals and the cost is  
356 usually much higher than target-specific tests. Second, the detection of DNA of a  
357 certain pathogen does not necessarily prove that it is responsible for the patient's  
358 clinical presentation and features<sup>23,27</sup>. In the present study, some patients were positive  
359 for EBV but had other more likely aetiologies of their infections. EBV DNA has often  
360 been identified together with other microorganisms in CSF<sup>43</sup>. Finally, mNGS cannot  
361 detect microorganisms that are not included in microbial genome databases.

362       Our study has several limitations. Reverse transcription was not performed to  
363 construct a DNA library and therefore, RNA viruses could not be detected by mNGS.  
364 Next-generation RNA sequencing should be performed in future prospective studies.  
365 The number of CNS infections caused by each pathogen were not sufficient to assess  
366 the sensitivity and specificity of mNGS for individual pathogens. Finally, we may  
367 have underestimated the sensitivity of mNGS of CSF for diagnosing CNS infections  
368 by employing strict criteria for a positive mNGS result and using conventional  
369 microbiological methods as the gold standard.

370

371 **List of abbreviations**

372 mNGS: metagenomic next-generation sequencing

373 CSF: cerebrospinal fluid

374 CNS: central nervous system

375 PCR: polymerase chain reaction

376 HSV: herpes simplex virus

377 VZV: varicella zoster virus

378 NTC: 'no-template' controls

379 RPM: reads per million

380 EBV: Epstein-Barr virus

381 CMV: cytomegalovirus

382 SSRN: species-specific read number

383

384 **Declarations**

385 *Ethics approval and consent to participate*

386 This study was approved by the institutional review board of Peking Union Medical

387 College Hospital (no. JS-890). Written informed consent was obtained from each

388 patient or their legal surrogate prior to enrolment.

389 *Consent for publication*

390 Not applicable.

391 *Availability of data and materials*

392 The datasets used and/or analysed during the current study are available from the

393 corresponding author on reasonable request.

394 ***Competing interests***

395 Author Honglong Wu was employed by company BGI-Tianjin and BGI-Shenzhen.

396 Author Yongjun Li was employed by company BGI-Shenzhen. All other authors

397 declare no competing interests.

398 ***Funding***

399 This study was funded by the National Key Research and Development Program of

400 China (Grant No. 2016YFC0901500); and National Science and Technology Major

401 Project of China (Grant No.2018ZX10305409)

402 ***Author's contributions***

403 HG and SF contributed to the study conception design. All the authors participated in

404 the discussion of the study design. SF, XW, YF, JS, YZ, WZ, XQ, CW, LL, LQ, SW,

405 HJ, HL, WY, WZ, XL, SL, YW, YP, HR, YZ, JW, BP, LC, WL, and HG enrolled

406 patients and collected the clinical data. HW, YL and WC performed NGS,

407 bioinformatics analysis, and PCR. SF, HG, XW, and WL analyzed the data. SF wrote

408 the first draft of the manuscript after discussions with HG, XW and WL. HW wrote

409 portions of the Methods section. HG, JHC, TG and WC contributed to manuscript

410 revision. All authors have read and approved the submitted version.

411 ***Acknowledgments***

412 The authors thank the patients for participating in this study.

413

414 **REFERENCE**

- 415 1. McGill F, Heyderman RS, Panagiotou S, Tunkel AR, Solomon T: Acute  
416 bacterial meningitis in adults. *Lancet* 2016, 388(10063):3036-3047.
- 417 2. Venkatesan A, Tunkel AR, Bloch KC, Lauring AS, Sejvar J, Bitnun A, Stahl JP,  
418 Mailles A, Drebot M, Rupprecht CE et al: Case definitions, diagnostic  
419 algorithms, and priorities in encephalitis: consensus statement of the  
420 international encephalitis consortium. *Clin Infect Dis* 2013, 57(8):1114-1128.
- 421 3. Feigin VL, Nichols E, Alam T, Bannick MS, Beghi E, Blake N, et al: Global,  
422 regional, and national burden of neurological disorders, 1990-2016: a  
423 systematic analysis for the Global Burden of Disease Study 2016 [published  
424 online March 14, 2019]. *Lancet Neurol.* doi:  
425 10.1016/S1474-4422(18)30499-X.
- 426 4. Feigin VL, Abajobir AA, Abate KH, Abd-Allah F, Abdulle AM, Abera SF, et al:  
427 Global, regional, and national burden of neurological disorders during  
428 1990-2015: a systematic analysis for the Global Burden of Disease Study 2015.  
429 *Lancet Neurol.* 2017;16(11):877-897.
- 430 5. Khatib U, van de Beek D, Lees JA, Brouwer MC. Adults with suspected  
431 central nervous system infection: A prospective study of diagnostic accuracy. *J*  
432 *Infect.* 2017;74(1):1-9.
- 433 6. Hasbun R, Rosenthal N, Balada-Llasat JM, Chung J, Duff S, Bozzette S,  
434 Zimmer L, Ginocchio CC: Epidemiology of Meningitis and Encephalitis in the  
435 United States, 2011-2014. *Clin Infect Dis.* 2017;65(3):359-363.

- 436 7. Granerod J, Ambrose HE, Davies NW, Clewley JP, Walsh AL, Morgan D,  
437 Cunningham R, Zuckerman M, Mutton KJ, Solomon T et al: Causes of  
438 encephalitis and differences in their clinical presentations in England: a  
439 multicentre, population-based prospective study. *Lancet Infect Dis.*  
440 2010;10(12):835-844.
- 441 8. Glaser CA, Honarmand S, Anderson LJ, Schnurr DP, Forghani B, Cossen CK,  
442 Schuster FL, Christie LJ, Tureen JH: Beyond viruses: clinical profiles and  
443 etiologies associated with encephalitis. *Clin Infect Dis.*  
444 2006;43(12):1565-1577.
- 445 9. Gu W, Miller S, Chiu CY. Clinical Metagenomic Next-Generation Sequencing  
446 for Pathogen Detection. *Annu Rev Pathol.* 2019;24(14):319-338.
- 447 10. Wilson MR, Suan D, Duggins A, Schubert RD, Khan LM, Sample HA, Zorn  
448 KC, Rodrigues Hoffman A, Blick A, Shingde M et al: A Novel Cause of  
449 Chronic Viral Meningoencephalitis: Cache Valley Virus. *Ann Neurol.*  
450 2017;82(1):105-114.
- 451 11. Mongkolrattanothai K, Naccache SN, Bender JM, Samayoa E, Pham E, Yu G,  
452 Dien Bard J, Miller S, Aldrovandi G, Chiu CY: Neurobrucellosis: Unexpected  
453 Answer From Metagenomic Next-Generation Sequencing. *J Pediatric Infect*  
454 *Dis Soc.* 2017;6(4):393-398.
- 455 12. Fan S, Ren H, Wei Y, Mao C, Ma Z, Zhang L, Wang L, Ge Y, Li T, Cui L et al:  
456 Next-generation sequencing of the cerebrospinal fluid in the diagnosis of  
457 neurobrucellosis. *Int J Infect Dis.* 2018;67:20-24.

- 458 13. Yao M, Zhou J, Zhu Y, Zhang Y, Lv X, Sun R, Shen A, Ren H, Cui L, Guan H  
459 et al: Detection of *Listeria monocytogenes* in CSF from Three Patients with  
460 Meningoencephalitis by Next-Generation Sequencing. *J Clin Neurol*.  
461 2016;12(4):446-451.
- 462 14. Fan S, Qiao X, Liu L, Wu H, Zhou J, Sun R, Chen Q, Huang Y, Mao C, Yuan J  
463 et al: Next-Generation Sequencing of Cerebrospinal Fluid for the Diagnosis of  
464 Neurocysticercosis. *Front Neurol*. 2018;9:471.
- 465 15. Guan H, Shen A, Lv X, Yang X, Ren H, Zhao Y, Zhang Y, Gong Y, Ni P, Wu H  
466 et al: Detection of virus in CSF from the cases with meningoencephalitis by  
467 next-generation sequencing. *J Neurovirol*. 2016;22(2):240-245.
- 468 16. Wilson MR, Shanbhag NM, Reid MJ, Singhal NS, Gelfand JM, Sample HA,  
469 Benkli B, O'Donovan BD, Ali IK, Keating MK et al: Diagnosing *Balamuthia*  
470 *mandrillaris* Encephalitis With Metagenomic Deep Sequencing. *Ann Neurol*.  
471 2015;78(5):722-730.
- 472 17. Wilson MR, Naccache SN, Samayoa E, Biagtan M, Bashir H, Yu G, Salamat  
473 SM, Somasekar S, Federman S, Miller S et al: Actionable diagnosis of  
474 neuroleptospirosis by next-generation sequencing. *N Engl J Med*.  
475 2014;370(25):2408-2417.
- 476 18. Parize P, Muth E, Richaud C, Gratigny M, Pilmis B, Lamamy A, Mainardi JL,  
477 Cheval J, de Visser L, Jagorel F et al: Untargeted next-generation  
478 sequencing-based first-line diagnosis of infection in immunocompromised  
479 adults: a multicentre, blinded, prospective study. *Clin Microbiol Infect*.

- 480 2017;23(8):574.e1-574.e6.
- 481 19. Naccache SN, Peggs KS, Mattes FM, Phadke R, Garson JA, Grant P, Samayoa  
482 E, Federman S, Miller S, Lunn MP et al: Diagnosis of neuroinvasive astrovirus  
483 infection in an immunocompromised adult with encephalitis by unbiased  
484 next-generation sequencing. *Clin Infect Dis*. 2015;60(6):919-923.
- 485 20. Hoffmann B, Tappe D, Hoper D, Herden C, Boldt A, Mawrin C,  
486 Niederstrasser O, Muller T, Jenckel M, van der Grinten E et al: A Variegated  
487 Squirrel Bornavirus Associated with Fatal Human Encephalitis. *N Engl J Med*.  
488 2015;373(2):154-162.
- 489 21. Brown JR, Morfopoulou S, Hubb J, Emmett WA, Ip W, Shah D, Brooks T,  
490 Paine SM, Anderson G, Virasami A et al: Astrovirus VA1/HMO-C: an  
491 increasingly recognized neurotropic pathogen in immunocompromised  
492 patients. *Clin Infect Dis*. 2015;60(6):881-888.
- 493 22. Wilson MR, O'Donovan BD, Gelfand JM, Sample HA, Chow FC, Betjemann  
494 JP, Shah MP, Richie MB, Gorman MP, Hajj-Ali RA et al: et al. Chronic  
495 Meningitis Investigated via Metagenomic Next-Generation Sequencing. *JAMA*  
496 *Neurol*. 2018;75(8):947-955.
- 497 23. Brown JR, Bharucha T, Breuer J: Encephalitis diagnosis using metagenomics:  
498 application of next generation sequencing for undiagnosed cases. *J Infect*.  
499 2018;76(3):225-240.
- 500 24. Miao Q, Ma Y, Wang Q, Pan J, Zhang Y, Jin W, Yao Y, Su Y, Huang Y, Wang  
501 M et al: Microbiological Diagnostic Performance of Metagenomic

- 502 Next-generation Sequencing When Applied to Clinical Practice. *Clin Infect*  
503 *Dis.* 2018;67(suppl\_2):S231-s240.
- 504 25. Solomon T, Michael BD, Smith PE, Sanderson F, Davies NW, Hart IJ, Holland  
505 M, Easton A, Buckley C, Kneen R et al: Management of suspected viral  
506 encephalitis in adults--Association of British Neurologists and British  
507 Infection Association National Guidelines. *J infect.* 2012;64(4):347-373.
- 508 26. Tunkel AR, Glaser CA, Bloch KC, Sejvar JJ, Marra CM, Roos KL, Hartman  
509 BJ, Kaplan SL, Scheld WM, Whitley RJ: The management of encephalitis:  
510 clinical practice guidelines by the Infectious Diseases Society of America.  
511 *Clin Infect Dis.* 2008;47(3):303-327.
- 512 27. Granerod J, Cunningham R, Zuckerman M, Mutton K, Davies NW, Walsh AL,  
513 Ward KN, Hilton DA, Ambrose HE, Clewley JP et al: Causality in acute  
514 encephalitis: defining aetiologies. *Epidemiol Infect.* 2010;138(6):783-800.
- 515 28. Schlaberg R, Chiu CY, Miller S, Procop GW, Weinstock G: Validation of  
516 Metagenomic Next-Generation Sequencing Tests for Universal Pathogen  
517 Detection. *Arch Pathol Lab Med.* 2017;141(6):776-786.
- 518 29. Perlejewski K, Popiel M, Laskus T, Nakamura S, Motooka D, Stokowy T,  
519 Lipowski D, Pollak A, Lechowicz U, Caraballo Cortes K et al:  
520 Next-generation sequencing (NGS) in the identification of  
521 encephalitis-causing viruses: Unexpected detection of human herpesvirus 1  
522 while searching for RNA pathogens. *J Virol Methods.* 2015;226:1-6.
- 523 30. Beck ES, Ramachandran PS, Khan LM, Sample HA, Zorn KC, O'Connell EM,



- 524 Nash T, Reich DS, Venkatesan A, DeRisi JL et al: Clinicopathology  
525 conference: 41-year-old woman with chronic relapsing meningitis. *Ann Neurol*.  
526 2019;85(2):161-169.
- 527 31. Zhao W, Wu Y, Li H, Li S, Fan S, Wu H, Li Y, Lu Y, Han J, Zhang W et al:  
528 Clinical experience and next-generation sequencing analysis of encephalitis  
529 caused by pseudorabies virus. *National Medical Journal of China*.  
530 2018;98(15):6.
- 531 32. Strong MJ, Xu G, Morici L, Splinter Bon-Durant S, Baddoo M, Lin Z, Fewell  
532 C, Taylor CM, Flemington EK: Microbial contamination in next generation  
533 sequencing: implications for sequence-based analysis of clinical samples.  
534 *PLoS Pathog*. 2014;10(11):e1004437.
- 535 33. Laurence M, Hatzis C, Brash DE: Common contaminants in next-generation  
536 sequencing that hinder discovery of low-abundance microbes. *PLoS One*.  
537 2014;9(5):e97876.
- 538 34. Kulakov LA, McAlister MB, Ogden KL, Larkin MJ, O'Hanlon JF: Analysis of  
539 bacteria contaminating ultrapure water in industrial systems. *Appl Environ*  
540 *Microbiol*. 2002;68(4):1548-1555.
- 541 35. Hocquet D, Muller A, Bertrand X: What happens in hospitals does not stay in  
542 hospitals: antibiotic-resistant bacteria in hospital wastewater systems. *J Hosp*  
543 *Infect*. 2016;93(4):395-402.
- 544 36. Verani M, Bigazzi R, Carducci A: Viral contamination of aerosol and surfaces  
545 through toilet use in health care and other settings. *Am J Infect Control*.

- 546 2014;42(7):758-762.
- 547 37. Lusk RW: Diverse and widespread contamination evident in the unmapped  
548 depths of high throughput sequencing data. *PLoS One*. 2014;9(10):e110808.
- 549 38. Nguyen TH, Park MD, Otto M: Host Response to *Staphylococcus epidermidis*  
550 Colonization and Infections. *Front Cell Infect Microbiol*. 2017;7:90.
- 551 39. Chew KL, Lee CK, Cross GB, Lum LHW, Yan B, Jureen R:  
552 Culture-confirmed cryptococcal meningitis not detected by *Cryptococcus* PCR  
553 on the Biofire meningitis/encephalitis panel<sup>®</sup>. *Clin Microbiol Infect*.  
554 2018;24(7):791-792.
- 555 40. Ellis JE, Missan DS, Shabilla M, Martinez D, Fry SE: Rapid infectious disease  
556 identification by next-generation DNA sequencing. *J Microbiol Methods*.  
557 2017;138:12-19.
- 558 41. Grad YH, Lipsitch M, Feldgarden M, Arachchi HM, Cerqueira GC, Fitzgerald  
559 M, Godfrey P, Haas BJ, Murphy CI, Russ C et al: Genomic epidemiology of  
560 the *Escherichia coli* O104:H4 outbreaks in Europe, 2011. *Proc Natl Acad Sci*  
561 *U S A*. 2012;109(8):3065-3070.
- 562 42. Tang P, Croxen MA, Hasan MR, Hsiao WW, Hoang LM: Infection control in  
563 the new age of genomic epidemiology. *Am J Infect Control*.  
564 2017;45(2):170-179.
- 565 43. Martelius T, Lappalainen M, Palomaki M, Anttila VJ: Clinical characteristics  
566 of patients with Epstein Barr virus in cerebrospinal fluid. *BMC Infect Dis*.  
567 2011;11:281.



569 **Table 1. Case definitions and exclusion criteria for encephalitis and meningitis**

| <b>Case definitions for encephalitis</b>                                                                                                                                                                                                                                                                                          |
|-----------------------------------------------------------------------------------------------------------------------------------------------------------------------------------------------------------------------------------------------------------------------------------------------------------------------------------|
| <b>Major criteria (required)</b>                                                                                                                                                                                                                                                                                                  |
| Patients presenting to medical attention with altered mental status (decreased or altered level of consciousness or personality change) lasting $\geq 24$ hrs with no alternative cause identified, and/or generalized or partial seizures not fully attributable to a pre-existing seizure disorder or a simple febrile seizure. |
| <b>Minor criteria (<math>\geq 2</math> points)</b>                                                                                                                                                                                                                                                                                |
| Documented fever $\geq 38^{\circ}\text{C}$ within the 72 hrs before or after presentation                                                                                                                                                                                                                                         |
| New onset of focal neurologic findings                                                                                                                                                                                                                                                                                            |
| CSF WBC count $\geq 5/\text{cubic mm}$                                                                                                                                                                                                                                                                                            |
| Abnormality of brain parenchyma on neuroimaging suggestive of encephalitis that is either new from prior studies or appears acute in onset                                                                                                                                                                                        |
| Abnormality on EEG that is consistent with encephalitis and not attributable to another cause.                                                                                                                                                                                                                                    |
| <b>Exclusion criteria for encephalitis</b>                                                                                                                                                                                                                                                                                        |
| $\leq 28$ days of age                                                                                                                                                                                                                                                                                                             |
| Non-infectious encephalitis, such as autoimmune disorders, paraneoplastic syndromes, NMOSD, neuropsychiatric involvement of rheumatic diseases                                                                                                                                                                                    |
| HIV or syphilis infection                                                                                                                                                                                                                                                                                                         |
| History of recent (within 4 weeks before the onset of disease) vaccination                                                                                                                                                                                                                                                        |
| Meningitis without clinical brain parenchyma involvement                                                                                                                                                                                                                                                                          |
| Absolute contraindications for lumbar puncture;                                                                                                                                                                                                                                                                                   |
| Traumatic LP with obvious blood-contaminated CSF                                                                                                                                                                                                                                                                                  |
| Pregnancy                                                                                                                                                                                                                                                                                                                         |
| Refusal to sign the informed consent                                                                                                                                                                                                                                                                                              |
| <b>Case definitions for meningitis</b>                                                                                                                                                                                                                                                                                            |
| Patients presenting to medical attention with at least two of the four symptoms of headache, fever (documented fever $\geq 38^{\circ}\text{C}$ within the 72 hrs before or after presentation), neck stiffness, decreased level of consciousness (defined by a Glasgow Coma Scale score below 14)                                 |
| CSF white blood cell count $\geq 5/\text{cubic mm}$                                                                                                                                                                                                                                                                               |
| <b>Exclusion criteria for meningitis</b>                                                                                                                                                                                                                                                                                          |
| $\leq 28$ days of age                                                                                                                                                                                                                                                                                                             |
| HIV or syphilis infection                                                                                                                                                                                                                                                                                                         |
| Meningeal malignancy confirmed by CSF cytology                                                                                                                                                                                                                                                                                    |
| Traumatic LP with obvious blood-contaminated CSF                                                                                                                                                                                                                                                                                  |
| Pregnancy                                                                                                                                                                                                                                                                                                                         |
| Refusal to sign the informed consent                                                                                                                                                                                                                                                                                              |

570 **Table 2.** Performance of mNGS of CSF compared to conventional microbiological  
 571 studies (gold standard) for the diagnosis of CNS infections

|                                     | TP*        | FP        | FN        | Etiologic Pathogen |
|-------------------------------------|------------|-----------|-----------|--------------------|
| <b>Bacteria</b>                     |            |           |           |                    |
| <i>Mycobacterium tuberculosis</i>   | 14         | 0         | 1         | 15                 |
| <i>Listeria monocytogenes</i>       | 8          | 0         | 0         | 8                  |
| <i>Brucella</i>                     | 7          | 1         | 1         | 8                  |
| <i>Streptococcus pneumoniae</i>     | 5          | 0         | 0         | 5                  |
| <i>Klebsiella pneumoniae</i>        | 3          | 0         | 0         | 3                  |
| <i>Streptococcus intermedius</i>    | 2          | 0         | 0         | 2                  |
| <i>Haemophilus influenzae</i>       | 2          | 0         | 0         | 2                  |
| <i>Vibrio vulnificus</i>            | 1          | 0         | 0         | 1                  |
| <i>Staphylococcus hominis</i>       | 1          | 0         | 0         | 1                  |
| <i>Escherichia coli</i>             | 0          | 2         | 0         | 0                  |
| <i>Enterococcus faecium</i>         | 0          | 2         | 0         | 0                  |
| <i>Acinetobacter baumannii</i>      | 1          | 2         | 0         | 1                  |
| <i>Stenotrophomonas maltophilia</i> | 1          | 1         | 0         | 1                  |
| <i>Pseudomonas aeruginosa</i>       | 0          | 4         | 1         | 1                  |
| <i>Staphylococcus aureus</i>        | 0          | 0         | 1         | 1                  |
| <i>Staphylococcus haemolyticus</i>  | 0          | 0         | 1         | 1                  |
| <b>DNA Viruses</b>                  |            |           |           |                    |
| Varicella-zoster virus              | 17         | 0         | 4         | 21                 |
| Herpes simplex virus 1              | 12         | 0         | 1         | 13                 |
| Epstein-Barr virus                  | 12         | 0         | 3         | 6                  |
| Cytomegalovirus                     | 4          | 0         | 0         | 2                  |
| Herpes simplex virus 2              | 2          | 0         | 0         | 2                  |
| <i>Suid herpesvirus 1</i>           | 2          | 0         | 0         | 2                  |
| BK polyomavirus                     | 1          | 0         | 0         | 0                  |
| John Cunningham virus               | 1          | 0         | 0         | 1                  |
| <b>Fungi</b>                        |            |           |           |                    |
| <i>Cryptococcus neoformans</i>      | 7          | 0         | 3         | 10                 |
| <i>Cryptococcus gattii</i>          | 1          | 0         | 0         | 1                  |
| <b>Parasites</b>                    |            |           |           |                    |
| <i>Taenia solium</i>                | 5          | 0         | 0         | 5                  |
| <i>Angiostrongylus cantonensis</i>  | 1          | 0         | 0         | 1                  |
| <b>Totals</b>                       | <b>110</b> | <b>12</b> | <b>16</b> | <b>114</b>         |

572 \* TP: true-positive; FP: false-positive; FN: false-negative; mNGS: metagenomic

573 next-generation sequencing; CSF: cerebrospinal fluid; CNS: central nervous system

574 **Figure legends**

575 **Figure 1.** Flowchart of patient enrolment and exclusion.

576

577 **Figure 2.** Distribution of causative pathogens in patients with suspected CNS

578 infections initially detected by NGS of CSF. (A) Of the 36.6% patients first diagnosed

579 with NGS of CSF, 16.3% were diagnosed with bacterial infections, 15.2% with viral

580 infections, 2.9% with fungal infections, and 2.2% with parasitic infections. (B) NGS

581 detected 11 bacterial species, the most common of which were *M. tuberculosis*

582 (13.9%) and *L. monocytogenes* (7.9%), 7 viral species, the most common of which

583 were VZV (16.8%) and HSV1 (11.9%), 2 fungal species, both of which were

584 *Cryptococcus* (7.9%) species, and 2 parasitic species, the most common of which was

585 *T. solium* (5.0%).

287 patients screened and sequenced

bioRxiv preprint doi: <https://doi.org/10.1101/658047>; this version posted June 10, 2019. The copyright holder for this preprint (which was not certified by peer review) is the author/funder, who has granted bioRxiv a license to display the preprint in perpetuity. It is made available under aCC-BY-NC-ND 4.0 International license.

11 patients excluded:  
Systematic vasculitis: 2 patients  
Rasmussen encephalitis: 1 patient  
Neuromyelitis optica spectrum disorders: 1 patient  
Idiopathic hypertrophic pachymeningitis: 1 patient  
Sjogren's syndrome: 1 patient  
Primary central nervous system lymphoma: 1 patient  
Autoinflammatory diseases: 1 patient  
Primary angiitis of the central nervous system: 1 patient  
Glioma: 1 patient  
Neuro-Behcets's syndrome: 1 patient

276 patients included

**A**

bioRxiv preprint doi: <https://doi.org/10.1101/658047>; this version posted June 10, 2019. The copyright holder for this preprint (which was not certified by peer review) is the author/funder, who has granted bioRxiv a license to display the preprint in perpetuity. It is made available under aCC-BY-NC-ND 4.0 International license.

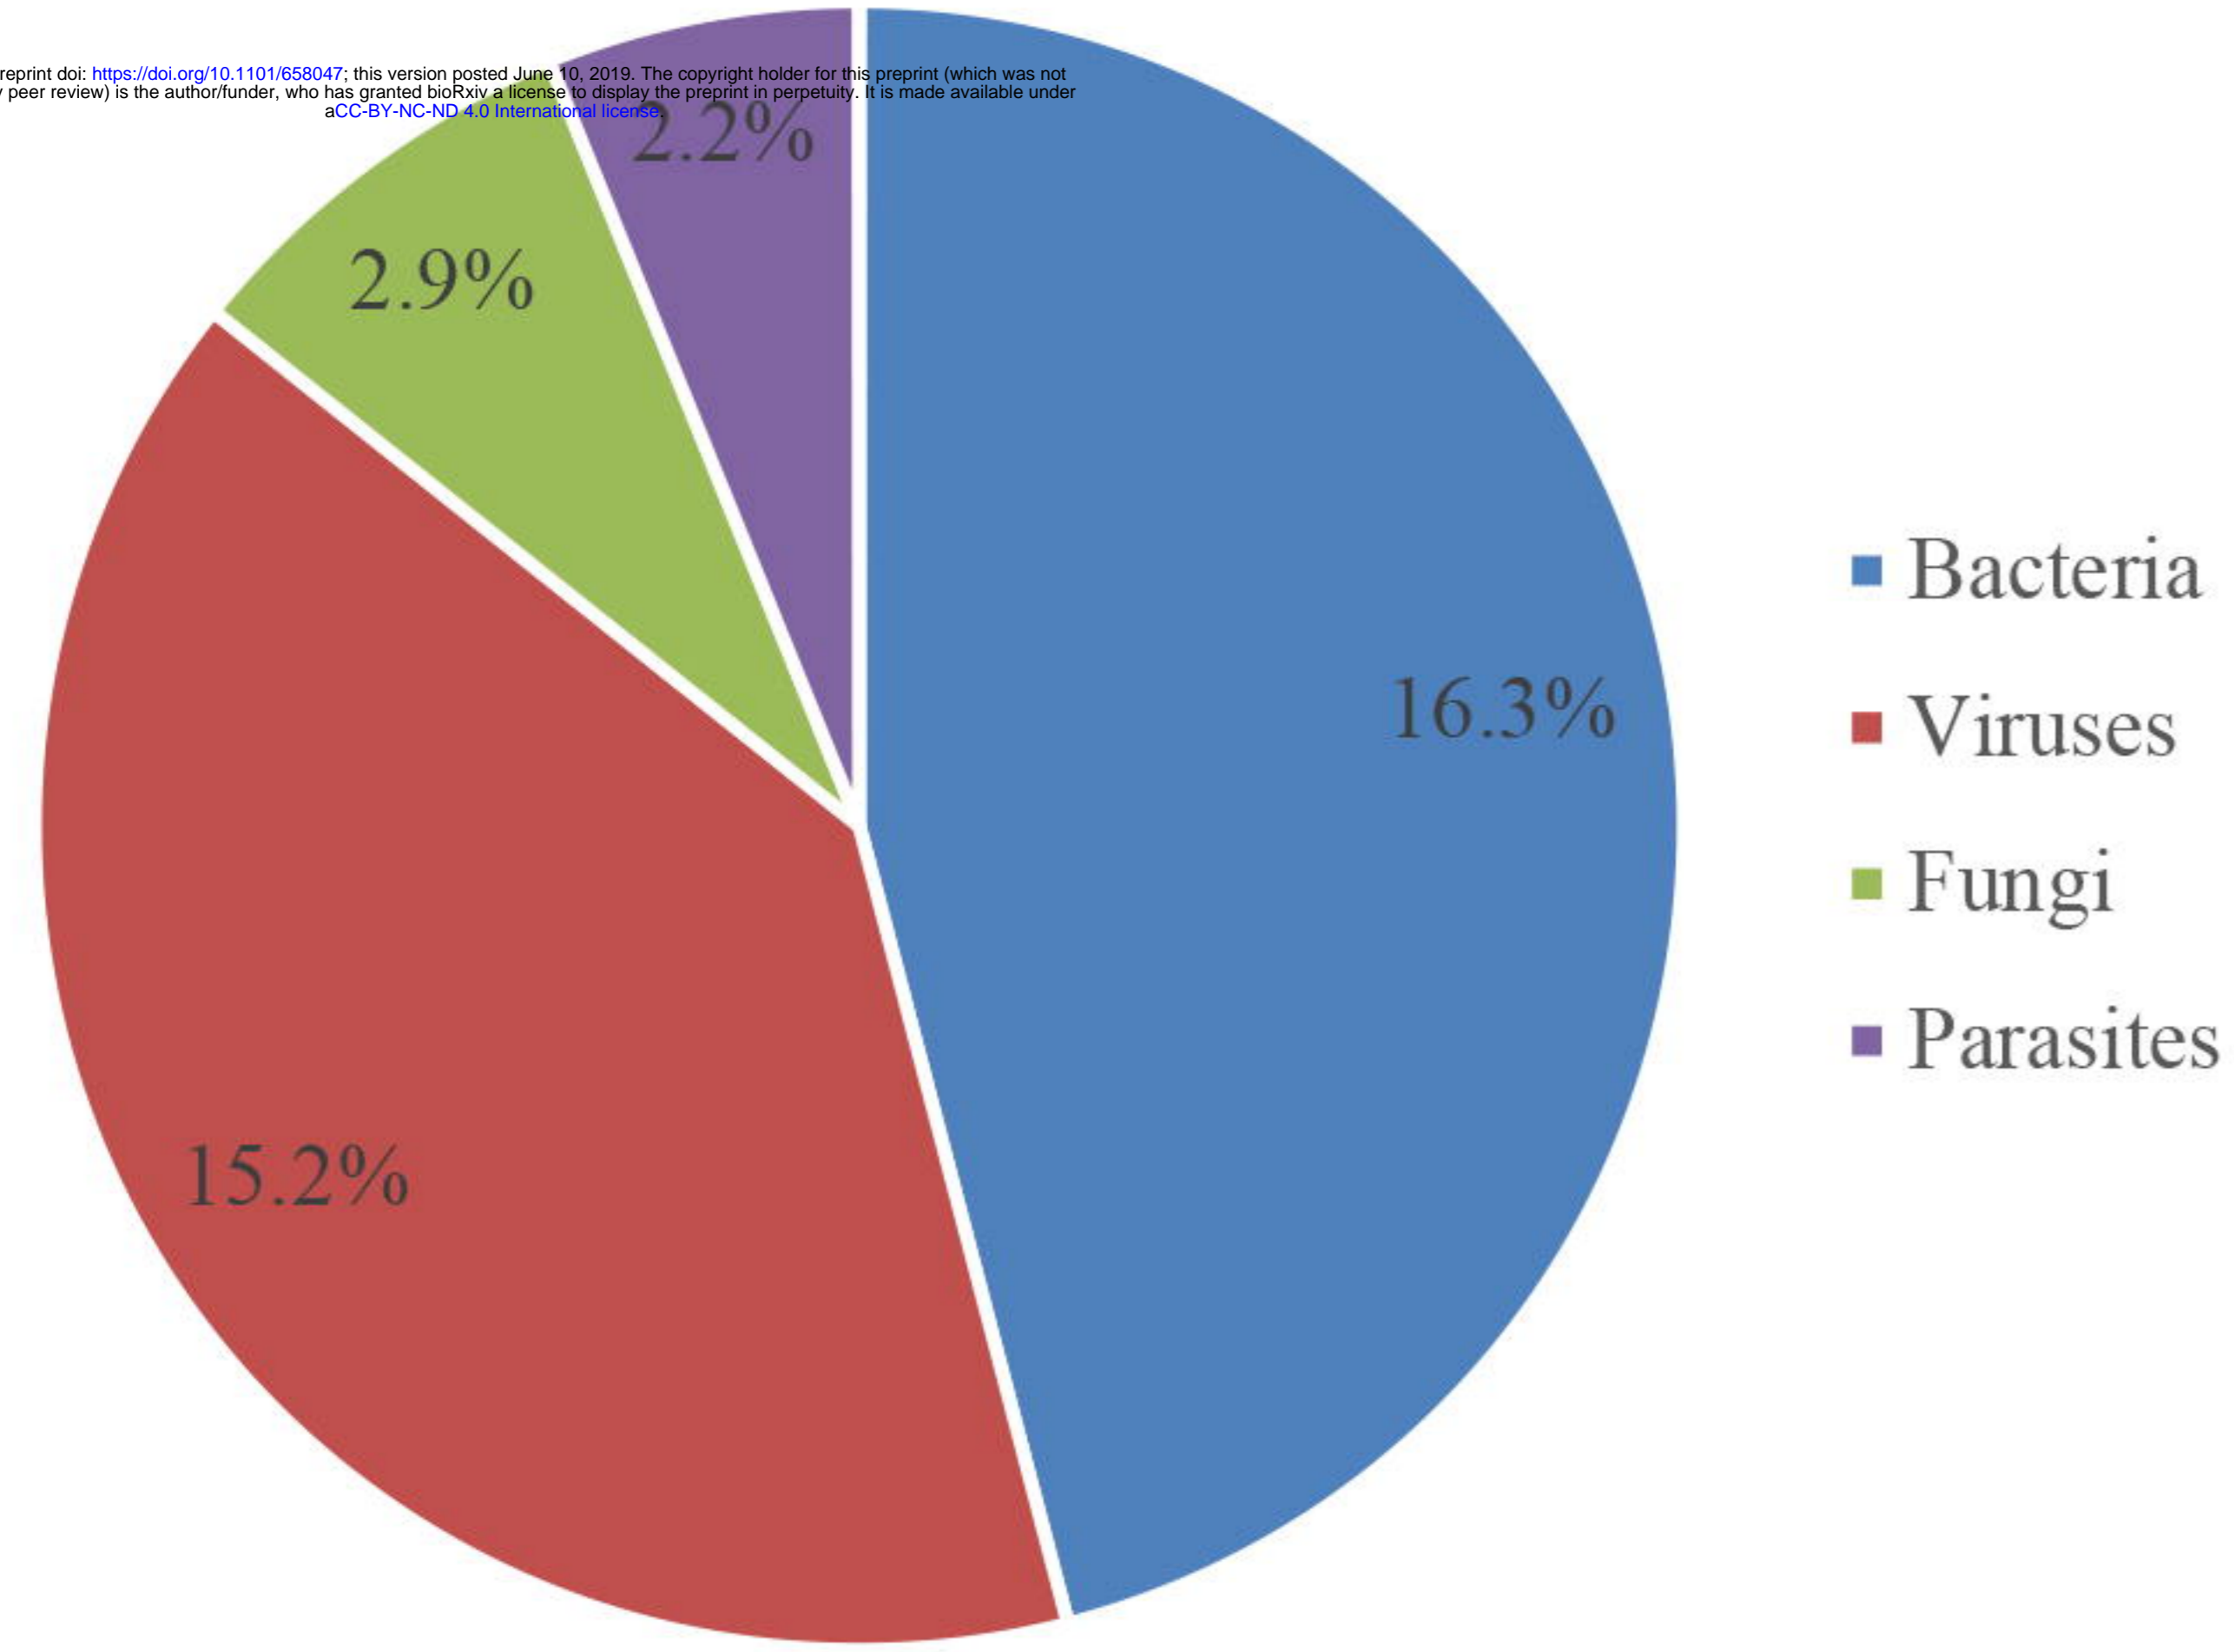**B**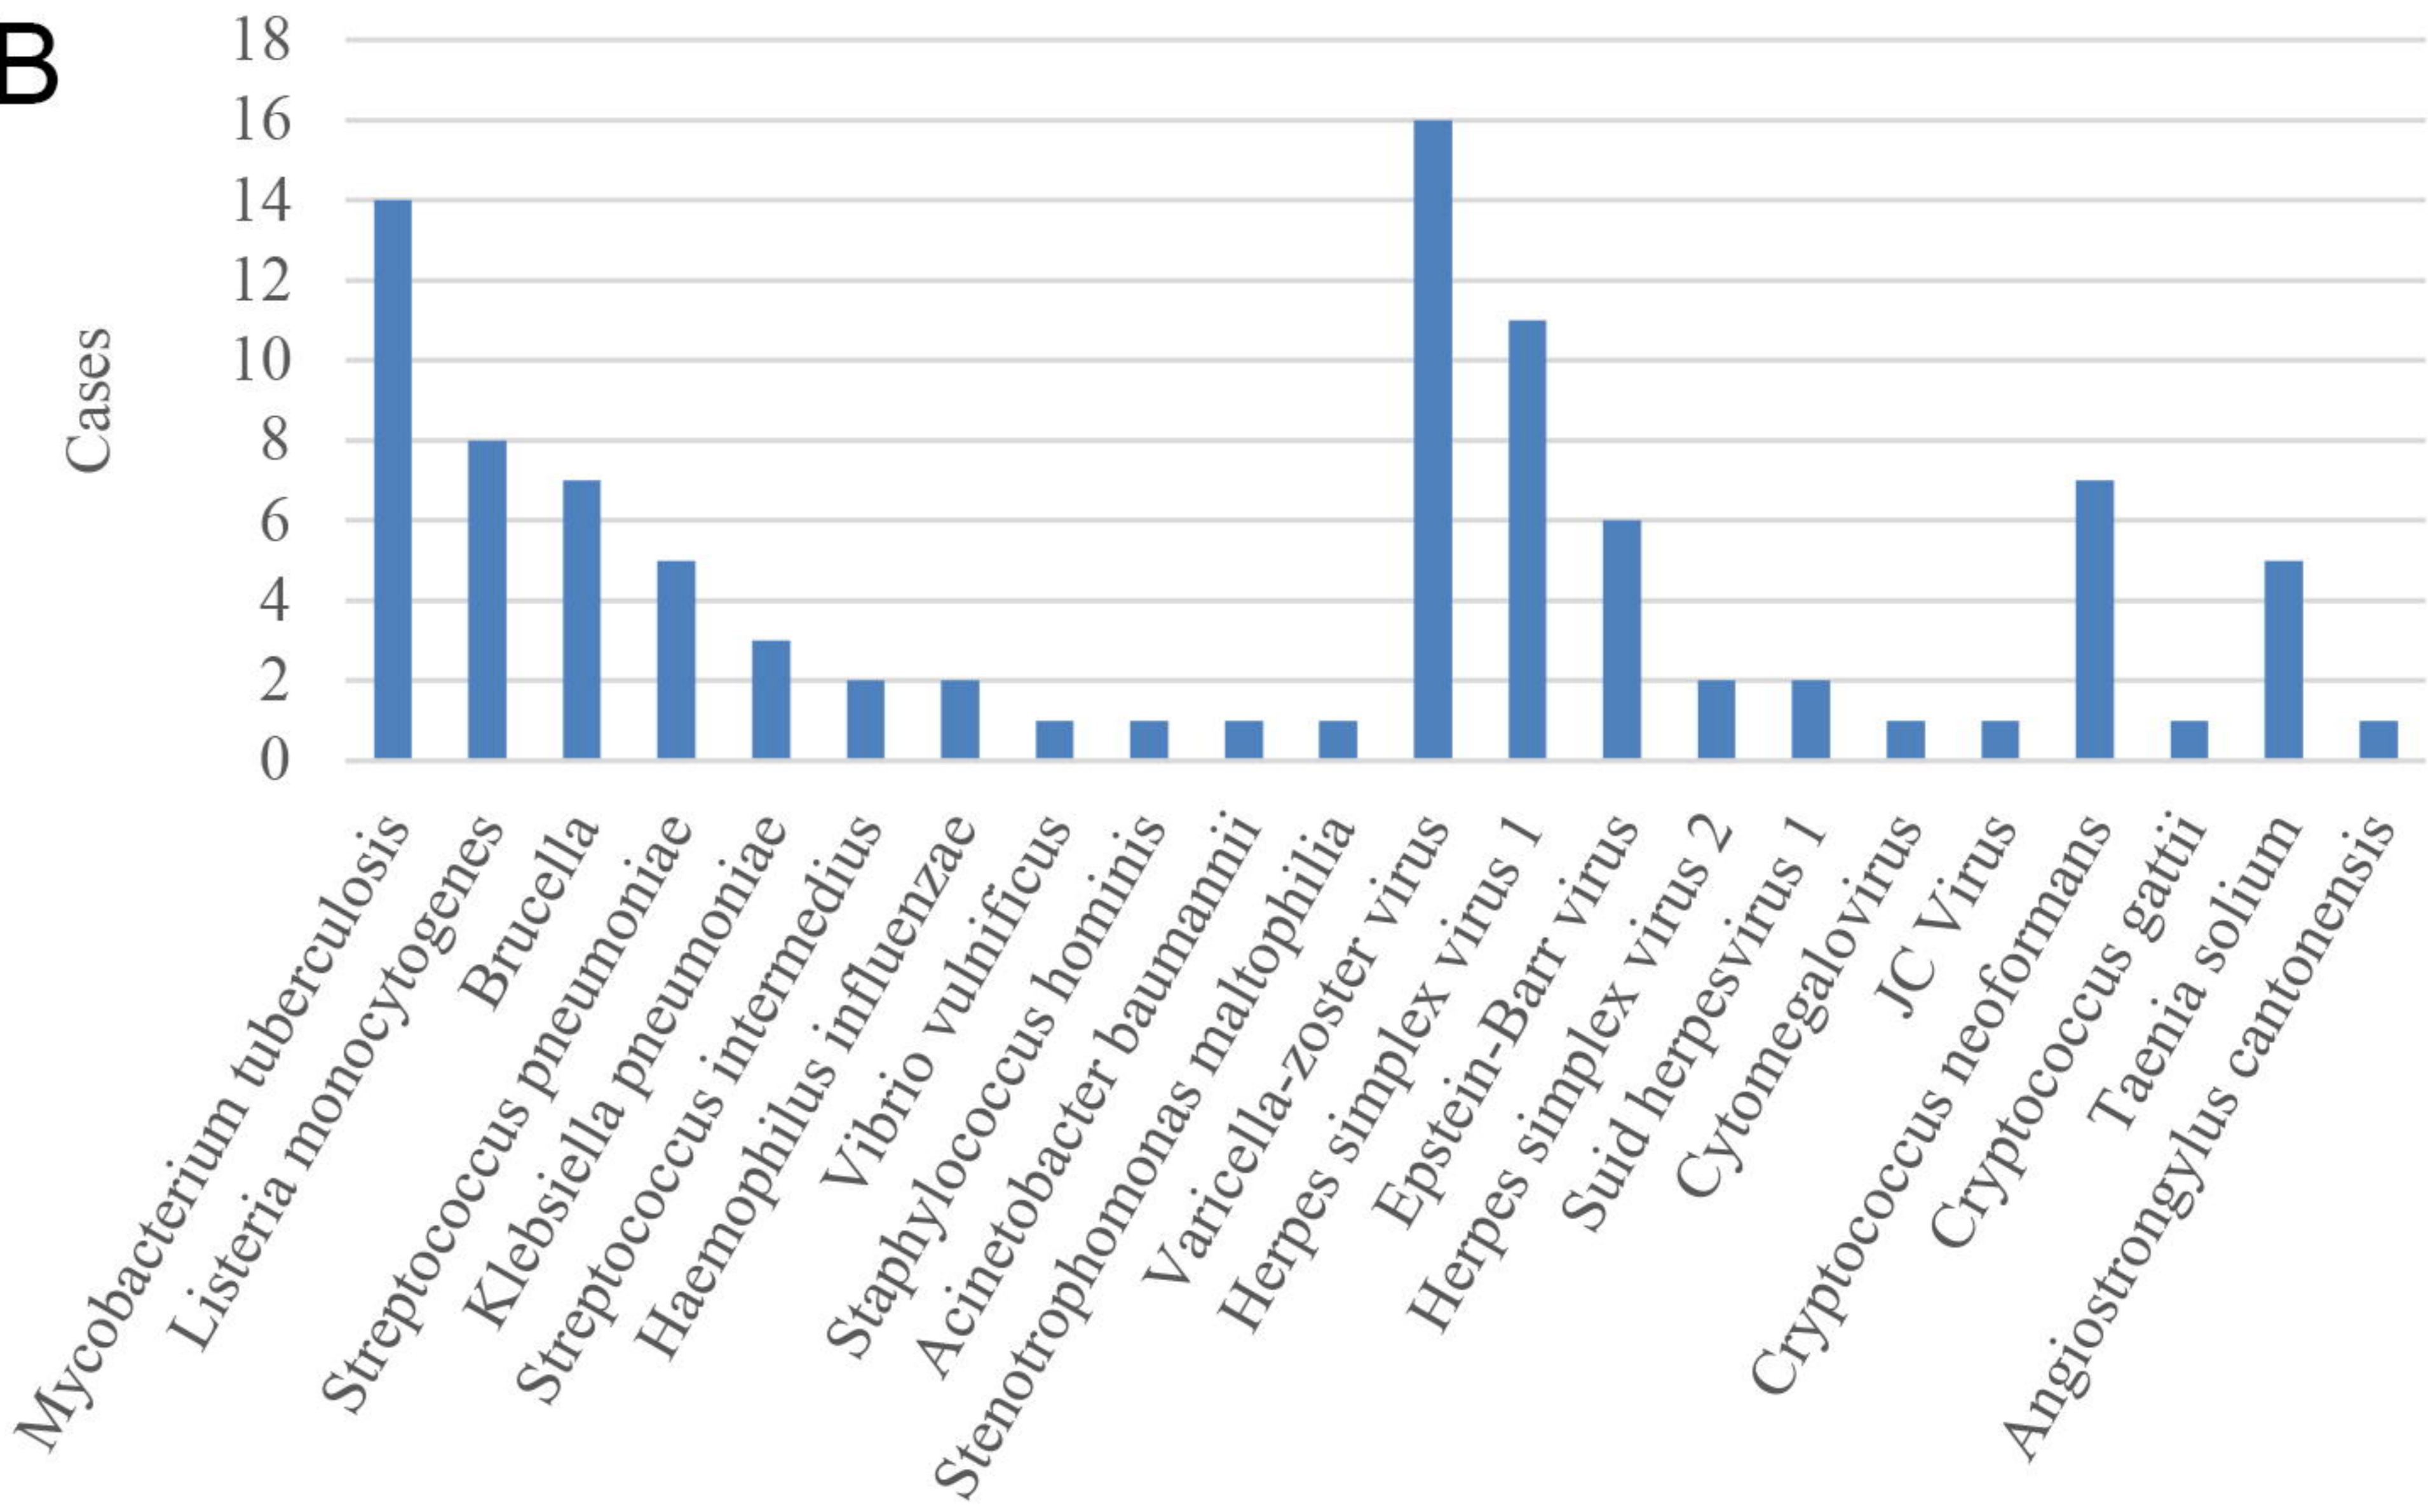

Source: https://biorxiv.org/content/biorxiv/early/2019/06/10/658047.full-text.pdf
